# Supplementary material for: Sodium‐Glucose Cotransporter 2 Inhibition for the Prevention of Cardiovascular Events in Patients With Type 2 Diabetes Mellitus: A Systematic Review and Meta‐Analysis
Source: PubMed Central journal article supplement — J Am Heart Assoc. 2020 Jan 29;9(3):e014908. doi: 10.1161/JAHA.119.014908 (PMC7033896; doi:10.1161/jaha.119.014908), 2020-01-29

# **SUPPLEMENTAL MATERIAL**

**Table S1. Electronic Search Terms.**

***MEDLINE via OVID***

- 1 canagliflozin.mp. or Canagliflozin/
- 2 dapagliflozin.mp.
- 3 empagliflozin.mp.
- 4 ertugliflozin.mp.
- 5 type 2 diabetes mellitus.mp. or Diabetes Mellitus, Type 2/
- 6 Diabetes Mellitus, Type 2/ or T2DM.mp.
- 7 Coronary Disease/ or Cardiovascular Diseases/ or Myocardial Infarction/ or cardiovascular mortality.mp.
- 8 Acute Coronary Syndrome/
- 9 heart failure.mp. or Heart Failure/
- 10 Stroke/
- 11 Mortality/
- 12 1 or 2 or 3 or 4
- 13 5 or 6
- 14 7 or 8 or 9 or 10 or 11
- 15 12 and 13 and 14
16. Limit 15 human

***EMBASE via OVID***

- 1 canagliflozin.mp. or Canagliflozin/
- 2 dapagliflozin.mp.
- 3 empagliflozin.mp.
- 4 ertugliflozin.mp.
- 5 type 2 diabetes mellitus.mp. or Diabetes Mellitus, Type 2/
- 6 Diabetes Mellitus, Type 2/ or T2DM.mp.
- 7 Coronary Disease/ or Cardiovascular Diseases/ or Myocardial Infarction/ or cardiovascular mortality.mp.
- 8 Acute Coronary Syndrome/
- 9 heart failure.mp. or Heart Failure/
- 10 Stroke/
- 11 Mortality/
- 12 1 or 2 or 3 or 4
- 13 5 or 6
- 14 7 or 8 or 9 or 10 or 11
- 15 12 and 13 and 14
16. Limit 15 human

**Table S2. Risk of Bias Assessment.**

|                        | <b>Sequence generation</b> | <b>Allocation sequence concealment</b> | <b>Blinding of participants and personnel</b> | <b>Blinding of outcome assessment</b> | <b>Incomplete outcome data</b> | <b>Selective outcome reporting</b> |
|------------------------|----------------------------|----------------------------------------|-----------------------------------------------|---------------------------------------|--------------------------------|------------------------------------|
| <b>EMPA-REG</b>        | Low risk                   | Low risk                               | Low risk                                      | Low risk                              | Low risk                       | Low risk                           |
| <b>CANVAS Program</b>  | Low risk                   | Low risk                               | Low risk                                      | Low risk                              | Low risk                       | Low risk                           |
| <b>DECLARE-TIMI 58</b> | Low risk                   | Low risk                               | Low risk                                      | Low risk                              | Low risk                       | Low risk                           |
| <b>CREDESCENCE</b>     | Low risk                   | Low risk                               | Low risk                                      | Low risk                              | Low risk                       | Low risk                           |

**Figure S1. PRISMA Flow Chart: Identification of Eligible Studies.**

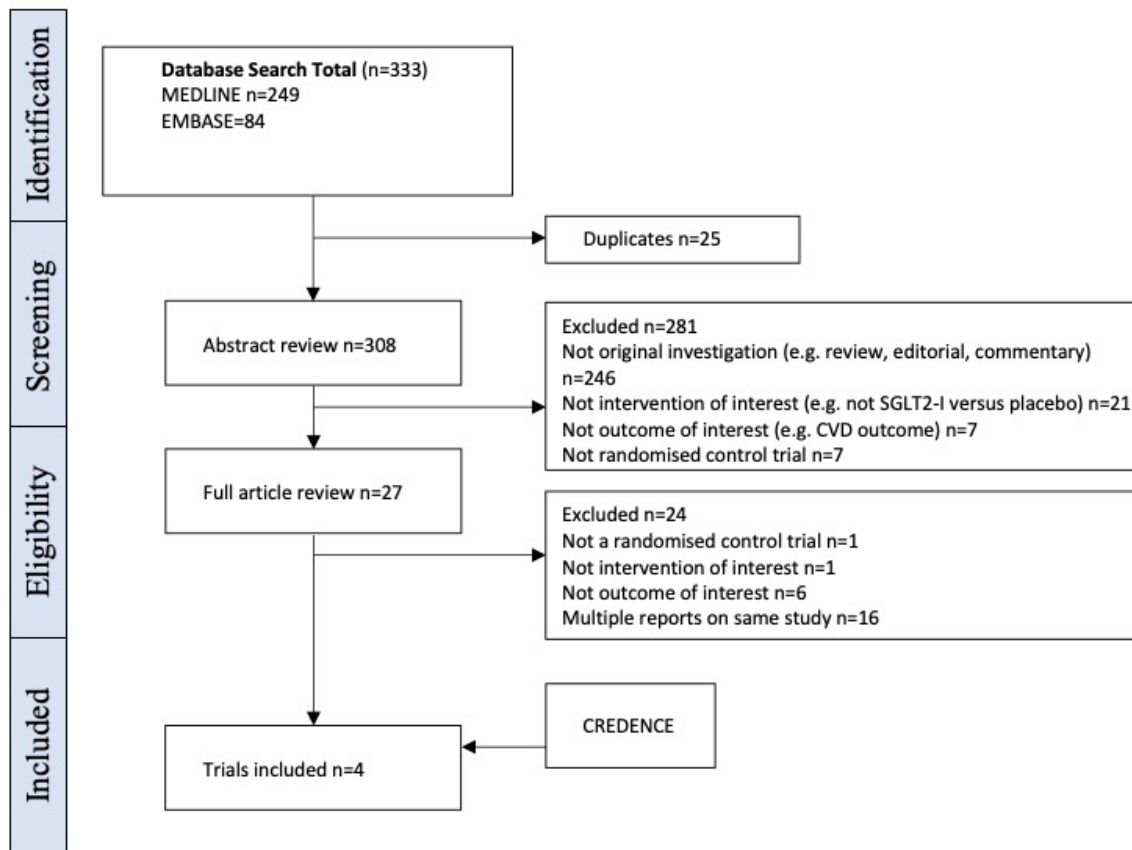

**Figure S2A. Effects of SGLT2 inhibition on MACE, CV death, total MI and total stroke for patients with (secondary prevention) and without (primary prevention) cardiovascular disease at baseline.**

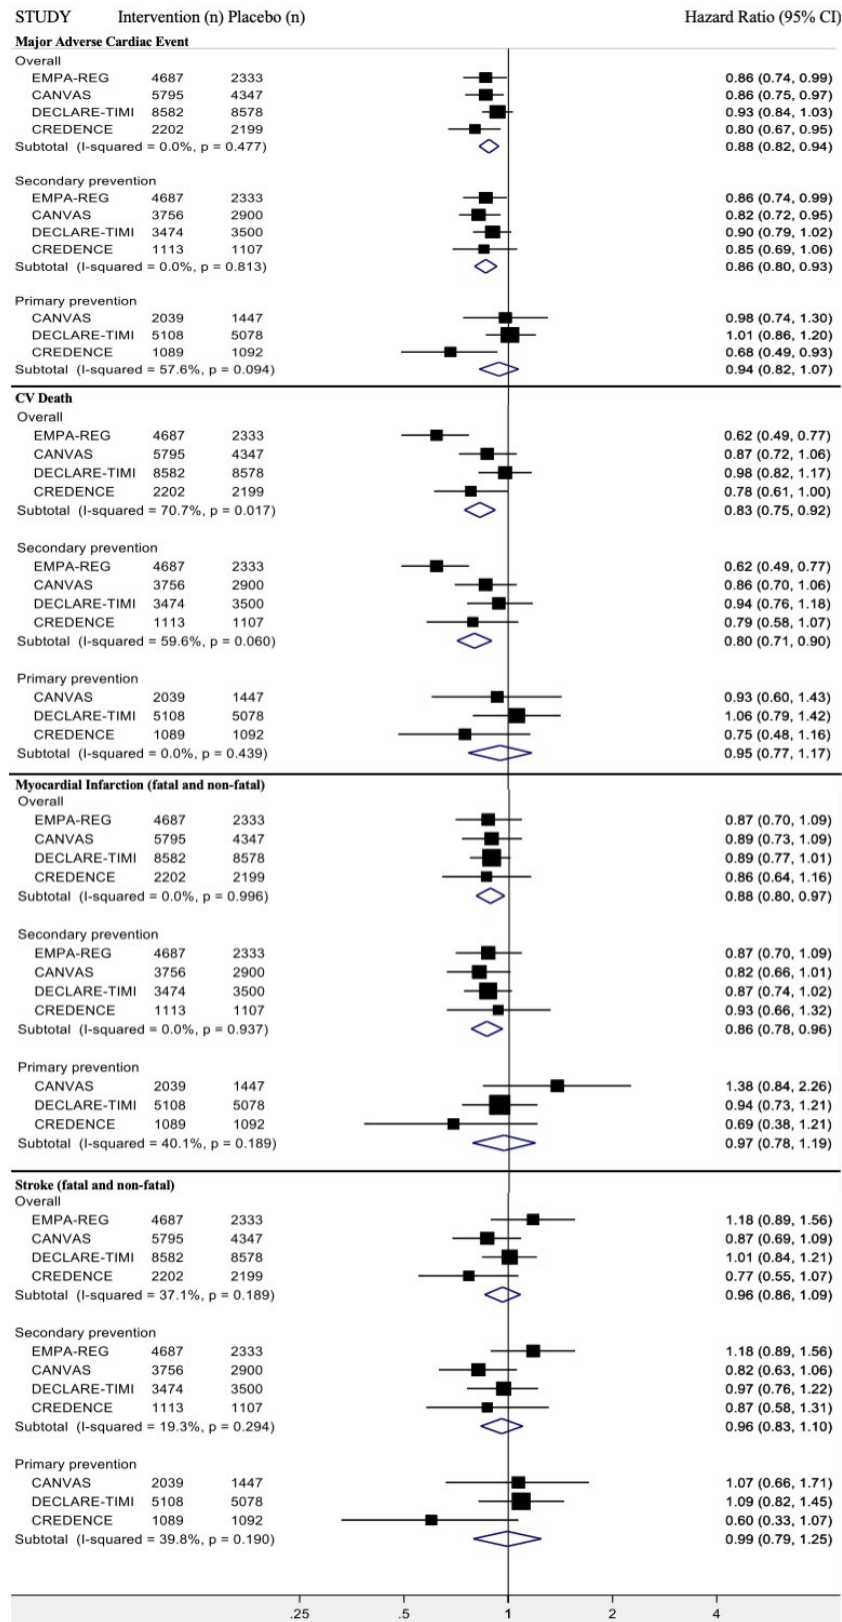

**Figure S2B. Effects of SGLT2 inhibition on HF hospitalization, CV death/HF hospitalization and all cause mortality for patients with (secondary prevention) and without (primary prevention) cardiovascular disease at baseline**

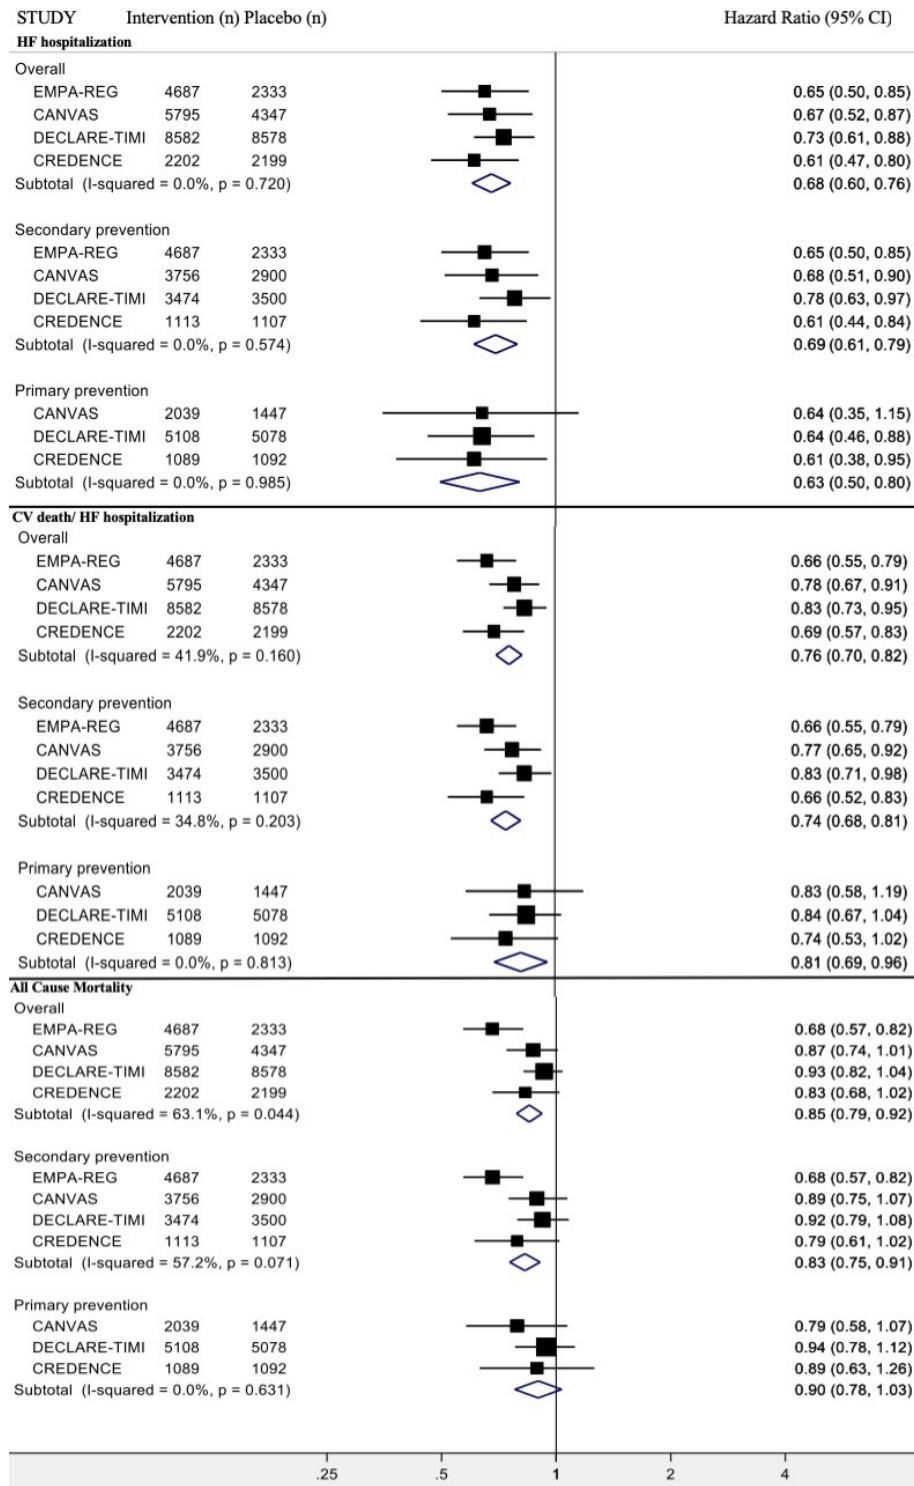

**Figure S2C. Effects of SGLT2 inhibition on non-fatal MI and stroke for patients with (secondary prevention) and without (primary prevention) cardiovascular disease at baseline**

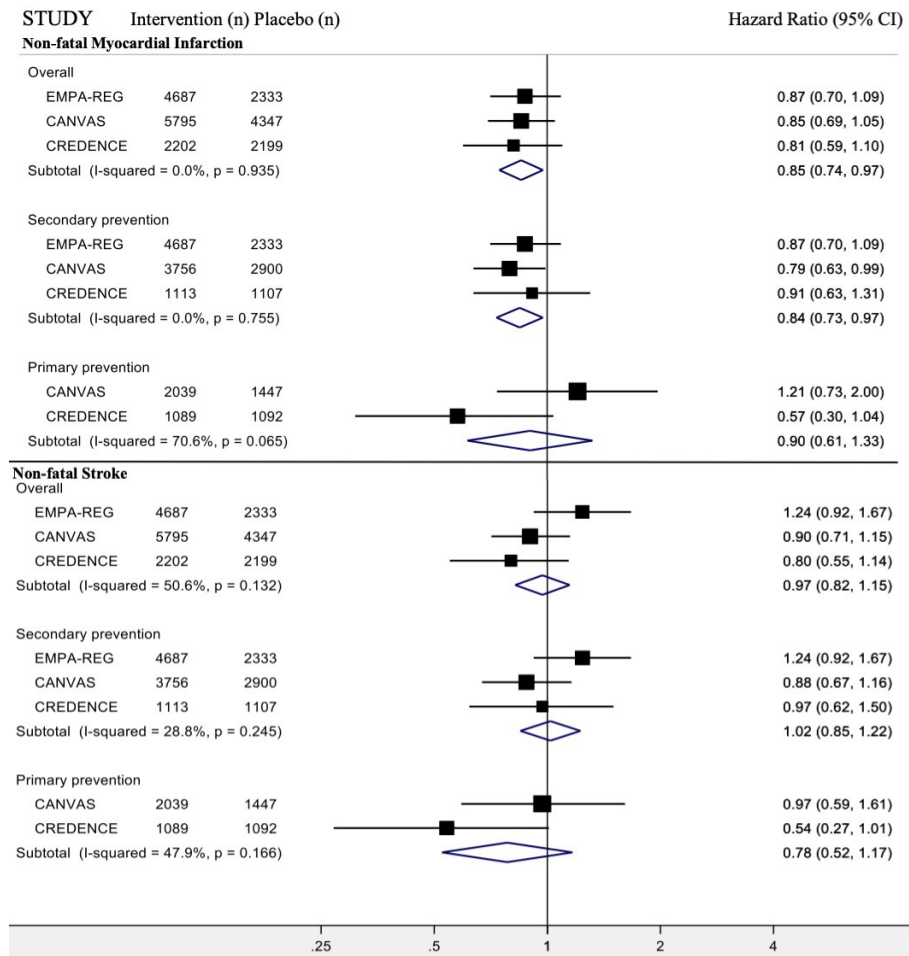

**Figure S3A. Effects of SGLT2 inhibition on MACE, CV death, total MI and total stroke for patient with (estimated glomerular filtration rate <60mls/min/1.73m<sup>2</sup>) and without (estimated glomerular filtration rate >60mls/min/1.73m<sup>2</sup>) reduced kidney function at baseline, for each included study**

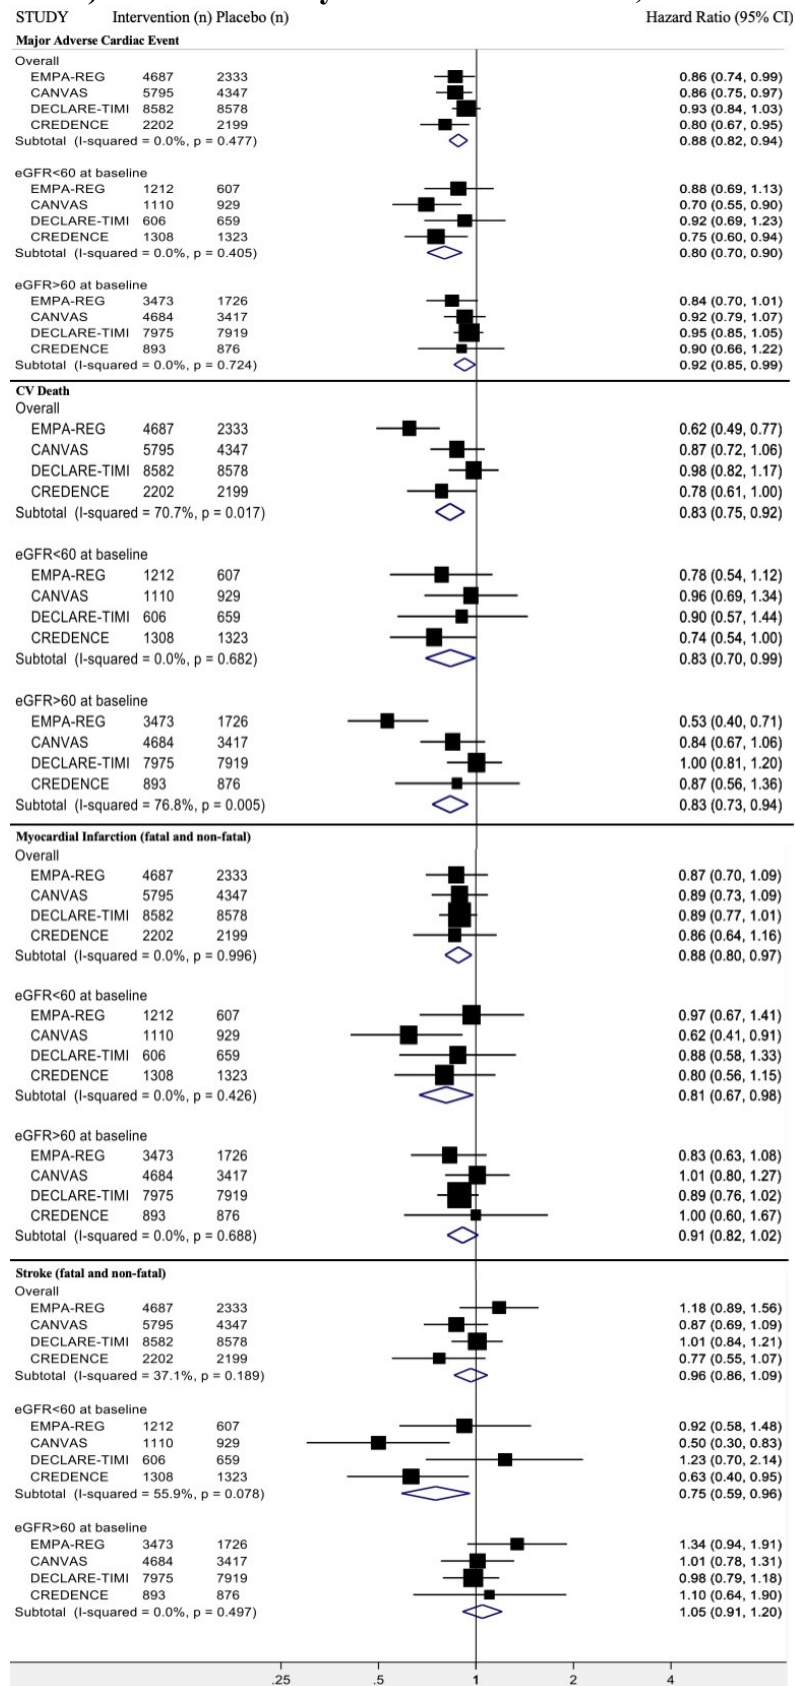



**Figure S3B. Effects of SGLT2 inhibition on HF hospitalization, CV death/HF hospitalization and all cause mortality for patients with (estimated glomerular filtration rate <60mls/min/1.73m<sup>2</sup>) and without (estimated glomerular filtration rate >60mls/min/1.73m<sup>2</sup>) reduced kidney function at baseline, for each included study**

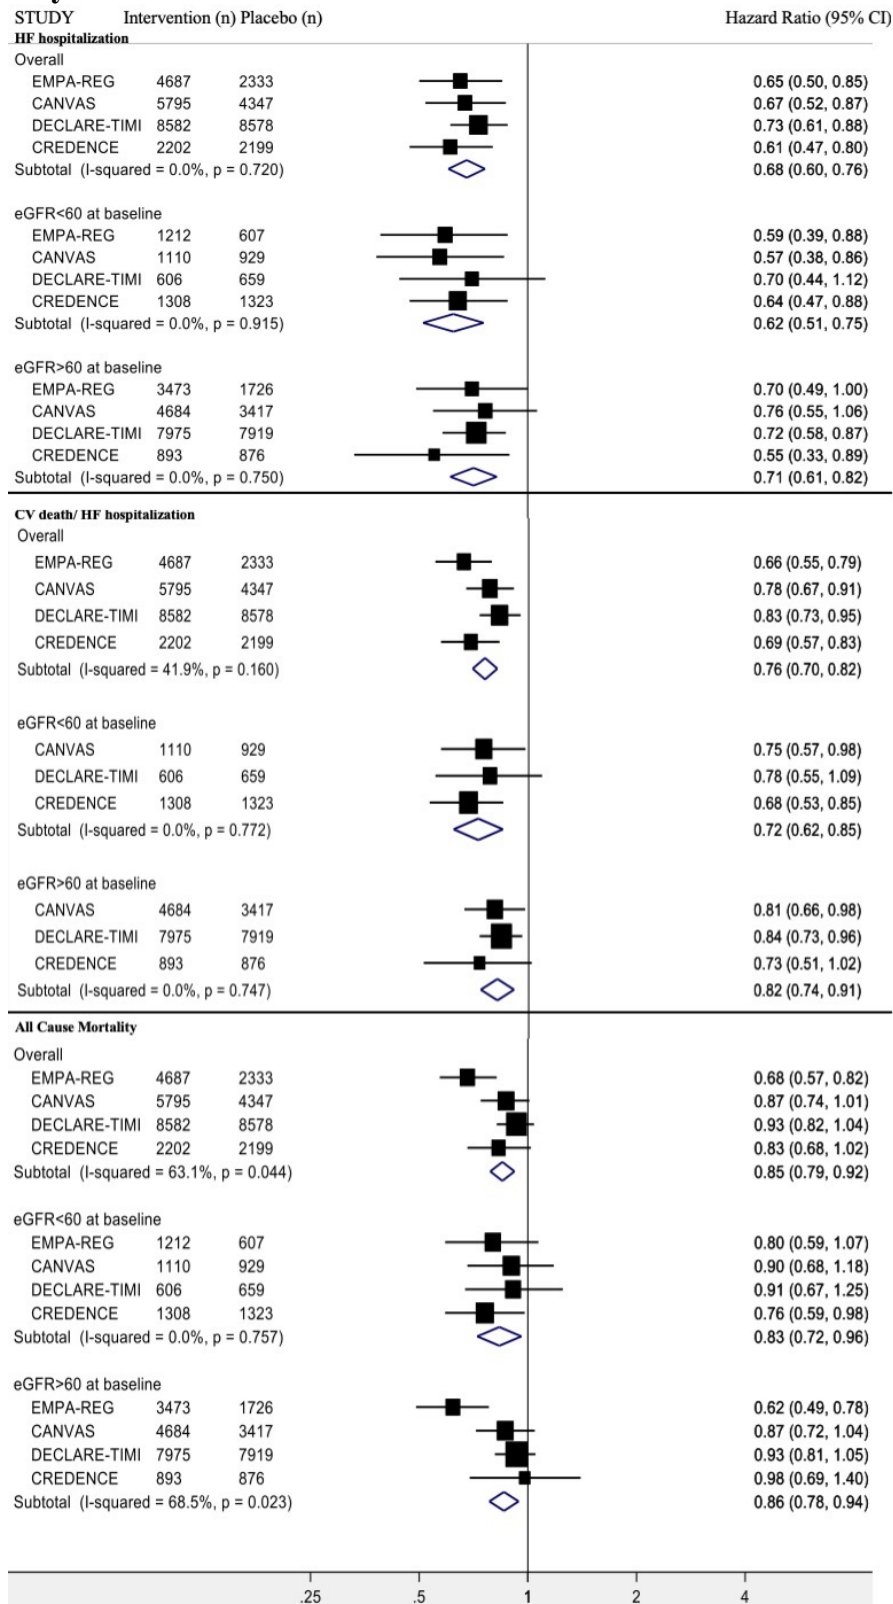

**Figure S3C. Effects of SGLT2 inhibition on non-fatal MI and stroke for patients with (estimated glomerular filtration rate <60mls/min/1.73m<sup>2</sup>) and without (estimated glomerular filtration rate >60mls/min/1.73m<sup>2</sup>) reduced kidney function at baseline, for each included study**

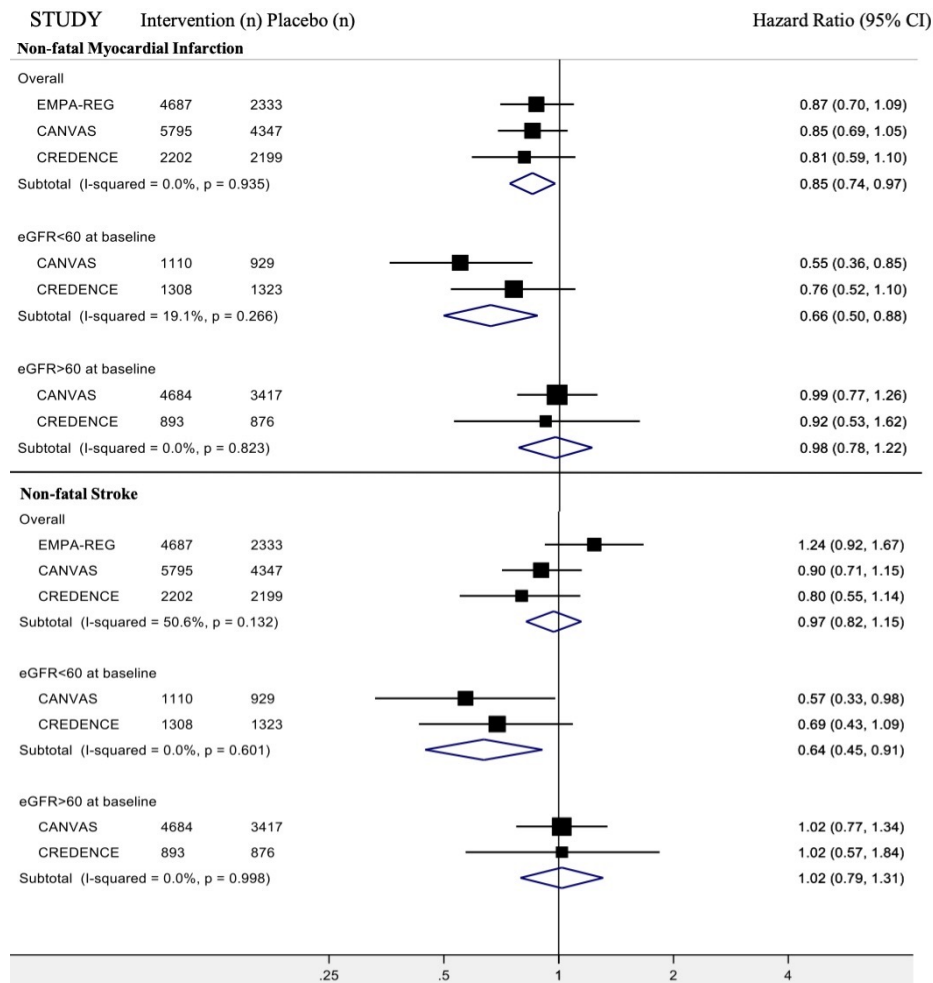

**Figure S4A. Effects of SGLT2 inhibition on MACE, CV death, total MI and total stroke for patients with and without a history of heart failure at baseline, for each included study**

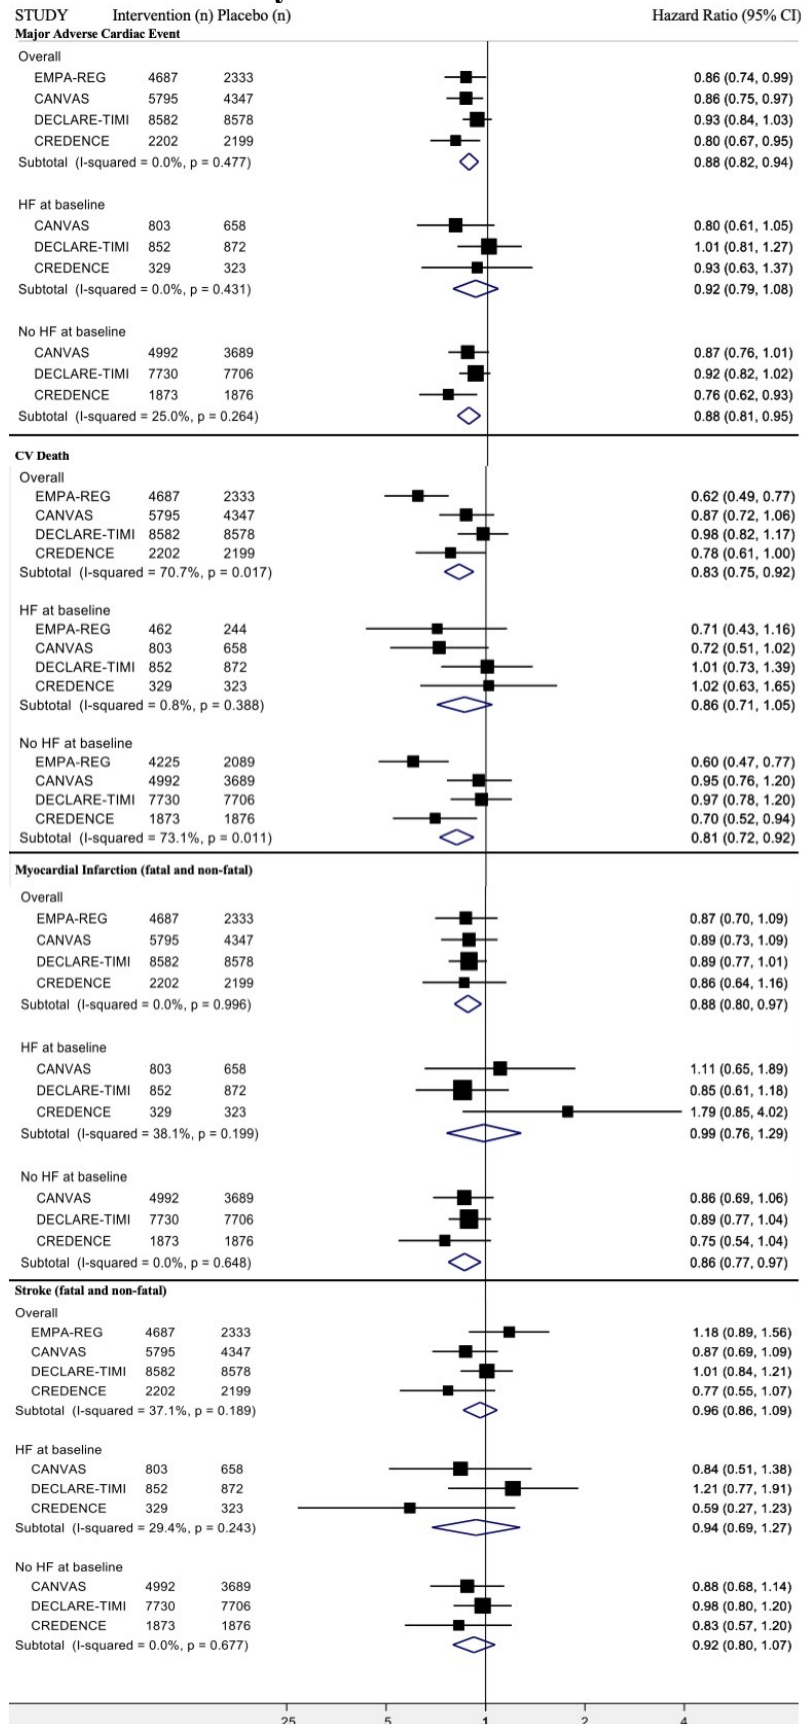

**Figure S4B. Effects of SGLT2 inhibition on HF hospitalization, CV death/HF hospitalization and all cause mortality for patients with and without a history of heart failure at baseline, for each included study**

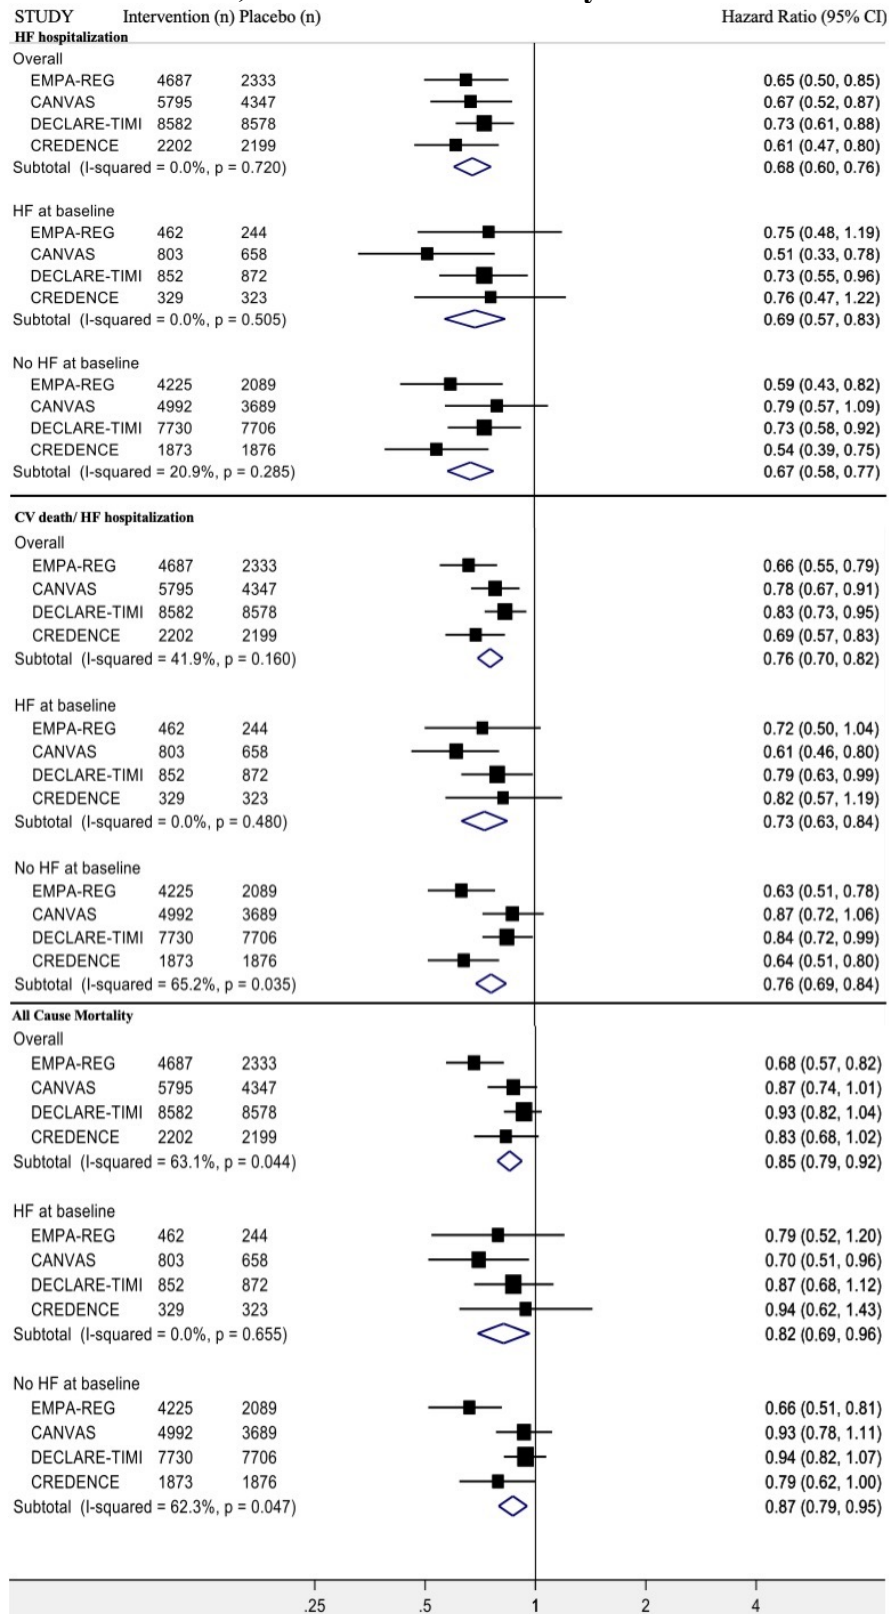

**Figure S4C. Effects of SGLT2 inhibition on non-fatal MI and stroke for patients with and without a history of heart failure at baseline, for each included study**

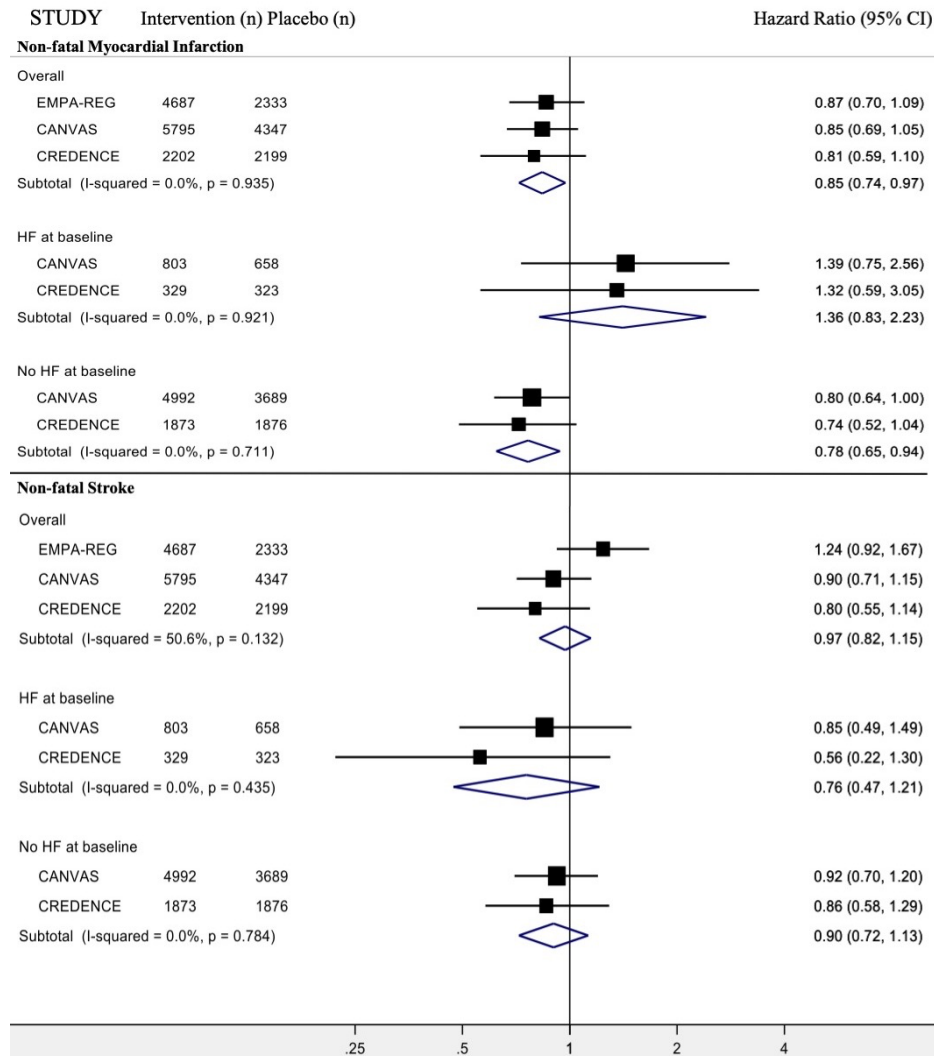

**Figure S5. Sensitivity Analysis for the Outcome of Serious Adverse Events without inclusion of Risk Ratios**

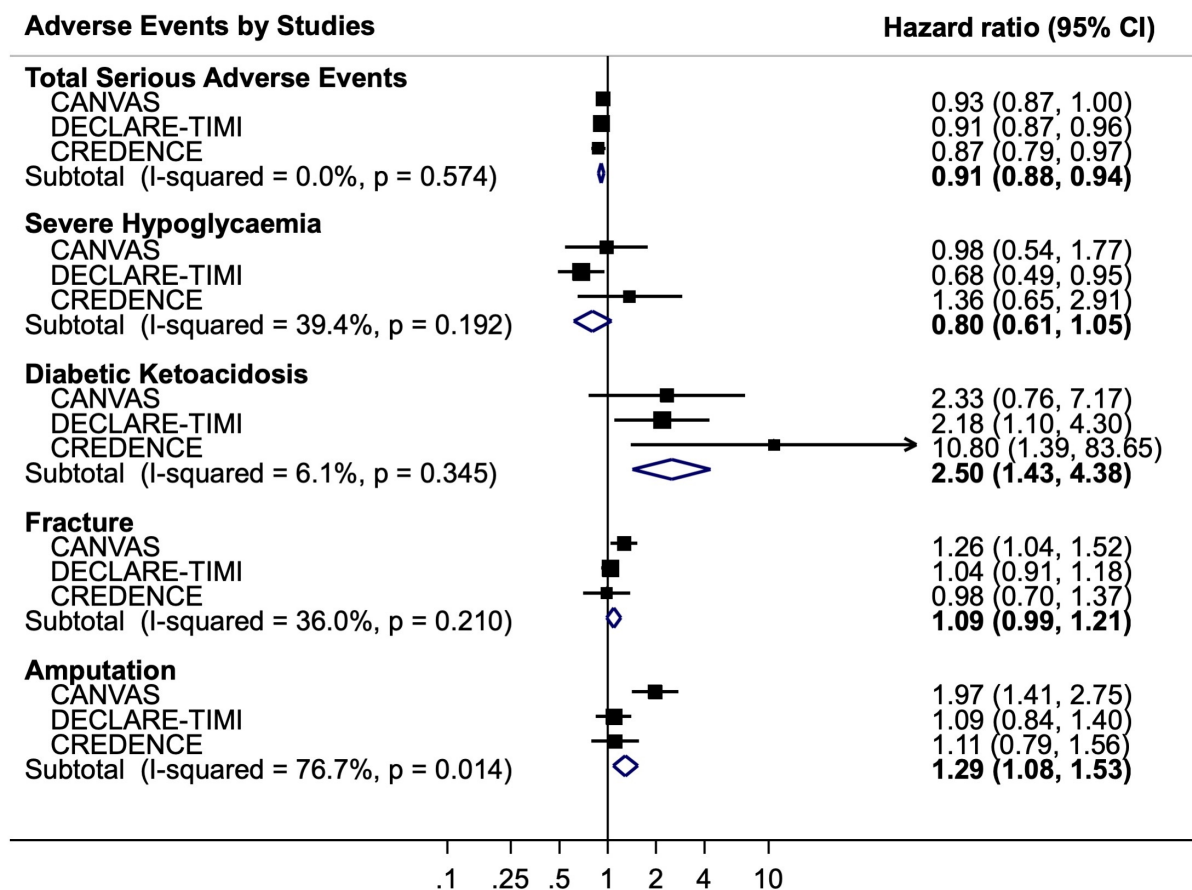

**Figure S6. The Effects of SGLT2 inhibition on Major Adverse Cardiac Outcomes for patients depending on Urine Albumin Creatinine Ratio at baseline**

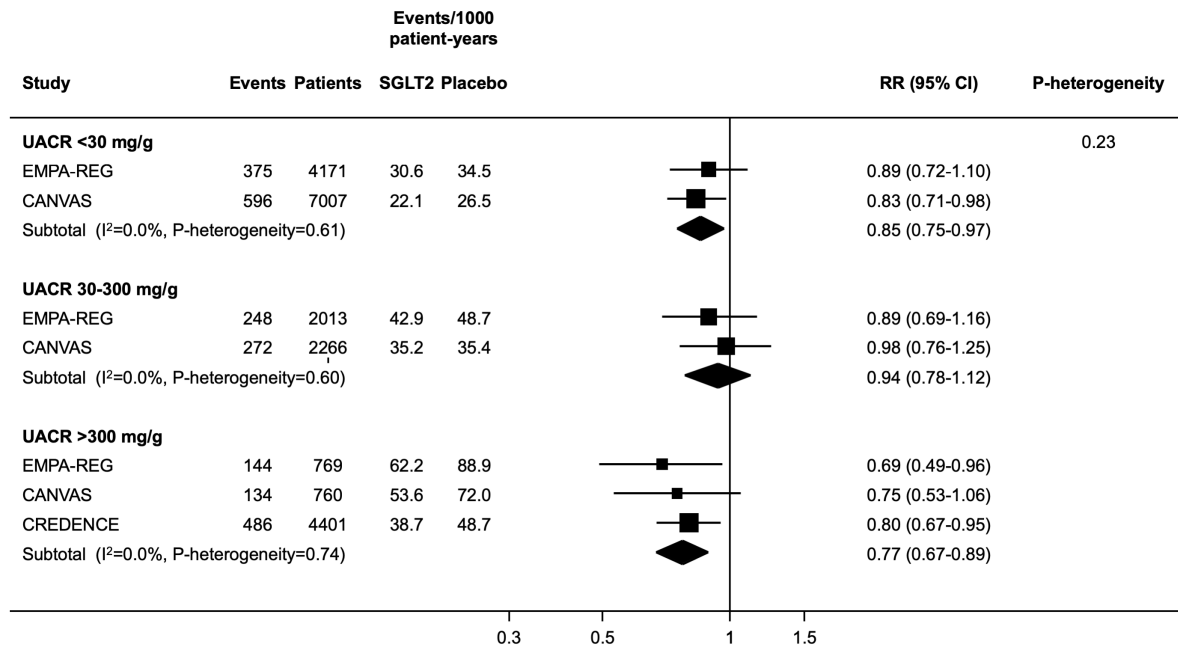

Supplement: JAH3-9-e014908-s001.pdf [file JAH3-9-e014908-s001.pdf]
